# Supplementary material for: Matrix-isolation FT-IR spectra and molecular orbital calculations on neutral N,N-dimethylglycine
Source: Royal Society of Chemistry journal article supplement (doi:10.1039/b207320j), 2002-12-13
Supplement: table.doc [file table.doc]

TABLE S1 (supplementary material). Optimised geometries for the most stable conformers of DMGa

| Parameter | GAT |  | ASC |  | GSC |  |
| --- | --- | --- | --- | --- | --- | --- |
|  | DFT/B3LYP | MP2 | DFT/B3LYP | MP2 | DFT/B3LYP | MP2 |
| Bond length/ pm |  |  |  |  |  |  |
| C1=O2 | 120.1 | 121.7 | 121.2 | 122.1 | 120.2 | 121.8 |
| C1-O3 | 134.3 | 135.1 | 136.0 | 136.5 | 135.8 | 136.6 |
| C1-C14 | 153.5 | 152.8 | 153.2 | 152.3 | 151.9 | 151.3 |
| O3-H4 | 98.3 | 98.6 | 97.3 | 97.3 | 96.9 | 97.3 |
| N5-C6 | 146.4 | 146.3 | 146.0 | 145.9 | 145.8 | 145.9 |
| N5-C10 | 146.7 | 146.6 | 146.0 | 145.9 | 146.0 | 146.0 |
| N5-C14 | 146.4 | 146.2 | 144.3 | 144.3 | 144.7 | 144.7 |
| C6-H7 | 109.2 | 108.9 | 109.5 | 109.0 | 109.3 | 109.0 |
| C6-H8 | 110.2 | 109.9 | 109.6 | 109.0 | 110.6 | 110.2 |
| C6-H9 | 109.2 | 108.9 | 110.2 | 109.6 | 109.2 | 109.0 |
| C10-H11 | 110.2 | 109.9 | 109.6 | 109.0 | 110.7 | 110.3 |
| C10-H12 | 109.2 | 109.0 | 109.5 | 109.0 | 109.0 | 108.6 |
| C10-H13 | 109.2 | 108.9 | 110.2 | 109.6 | 109.2 | 108.9 |
| C14-H15 | 109.8 | 109.6 | 109.8 | 109.4 | 110.8 | 110.5 |
| C14-H16 | 109.4 | 109.3 | 109.8 | 109.4 | 109.4 | 109.2 |
| Bond angles/° |  |  |  |  |  |  |
| O2=C1-O3 | 123.2 | 123.2 | 122.4 | 122.8 | 122.6 | 122.9 |
| O2=C1-C14 | 123.4 | 123.5 | 126.8 | 126.8 | 127.6 | 127.6 |
| O3-C1-C14 | 113.4 | 113.3 | 110.8 | 110.4 | 109.7 | 109.5 |
| C1-O3-H4 | 105.2 | 104.5 | 107.3 | 106.5 | 107.1 | 106.3 |
| C6-N5-C10 | 111.7 | 110.8 | 113.5 | 112.6 | 111.6 | 110.4 |
| C6-N5-C14 | 113.4 | 112.0 | 114.9 | 113.8 | 111.3 | 109.9 |
| C10-N5-C14 | 111.9 | 110.7 | 114.9 | 113.8 | 112.9 | 111.5 |
| N5-C6-H7 | 109.8 | 109.4 | 108.9 | 108.5 | 110.1 | 109.6 |
| N5-C6-H8 | 112.7 | 112.3 | 109.4 | 109.0 | 113.1 | 112.6 |
| N5-C6-H9 | 109.4 | 109.0 | 113.7 | 113.4 | 109.3 | 109.0 |
| H7-C6-H8 | 108.8 | 109.0 | 107.7 | 108.1 | 108.3 | 108.7 |
| H7-C6-H9 | 108.1 | 108.6 | 108.4 | 108.7 | 108.0 | 108.5 |
| H8-C6-H9 | 108.2 | 108.5 | 108.6 | 109.0 | 108.0 | 108.3 |
| N5-C10-H11 | 112.1 | 111.7 | 109.4 | 109.0 | 112.4 | 111.8 |
| N5-C10-H12 | 110.0 | 109.7 | 108.9 | 108.5 | 110.0 | 109.7 |
| N5-C10-H13 | 109.6 | 109.3 | 113.7 | 113.4 | 109.2 | 108.9 |
| H11-C10-H12 | 108.3 | 108.6 | 107.7 | 108.1 | 109.0 | 109.4 |
| H11-C10-H13 | 108.5 | 108.9 | 108.6 | 109.0 | 108.2 | 108.5 |
| H12-C10-H13 | 108.1 | 108.6 | 108.4 | 108.7 | 108.0 | 108.5 |
| C1-C14-N5 | 111.7 | 110.7 | 117.4 | 116.9 | 114.3 | 113.5 |
| C1-C14-H15 | 108.4 | 108.6 | 106.8 | 107.0 | 107.1 | 107.3 |
| C1-C14-H16 | 106.0 | 106.6 | 106.8 | 107.0 | 106.3 | 106.7 |
| N5-C14-H15 | 113.8 | 113.7 | 109.7 | 109.5 | 113.5 | 113.2 |
| N5-C14-H16 | 109.4 | 109.1 | 109.7 | 109.5 | 109.4 | 109.2 |
| H15-C14-H16 | 107.1 | 107.8 | 105.9 | 106.4 | 105.8 | 106.5 |
| Dihedral angles/° |  |  |  |  |  |  |
| O2=C1-O3-H4 | -178.5 | -178.0 | 0.00 | 0.0 | -0.2 | -0.3 |
| N5-C14-C1=O2 | 163.1 | 160.1 | 0.00 | 0.0 | 1.4 | 1.3 |
| O2=C1-C14-H15 | 37.0 | 34.7 | 123.5 | 123.1 | -125.2 | -124.5 |
| O2=C1-C14-H16 | -77.7 | -81.3 | -123.5 | -123.1 | 122.1 | 121.6 |
| C14-N5-C6-H7 | -56.5 | -59.1 | -167.5 | -169.0 | -57.3 | -59.4 |
| C14-N5-C6-H8 | 64.6 | 61.9 | -49.9 | -51.5 | 63.9 | 61.7 |
| C14-N5-C6-H9 | -175.1 | -177.8 | 71.7 | 70.1 | -175.7 | -178.0 |
| C14-N5-C10-H11 | -66.4 | -64.9 | 49.9 | 51.5 | -63.0 | -60.4 |
| C14-N5-C10-H12 | 54.3 | 55.6 | 167.5 | 169.0 | 58.7 | 61.1 |
| C14-N5-C10-H13 | 173.0 | 174.5 | -71.7 | -71.1 | 177.0 | 179.7 |
| C6-N5-C14-C1 | 146.4 | 152.6 | -67.1 | -65.4 | 163.1 | 166.5 |
| C10-N5-C14-C1 | -86.2 | -83.1 | 67.1 | 65.4 | -70.4 | -70.8 |
| Rotational constants/MHz |  |  |  |  |  |  |
| A | 5038.3175 | 5060.1575 | 4709.5312 | 4688.2607 | 5227.9067 | 5224.3480 |
| B | 1578.9503 | 1598.4280 | 1657.8424 | 1694.9500 | 1609.4309 | 1628.8289 |
| C | 1523.7385 | 1541.0098 | 1647.8716 | 1674.3124 | 1366.2106 | 1378.3721 |

a See Figure 1 for atom numbering.

TABLE S2 (supplementary material). Observed and calculated (scaled, DFT (B3LYP)/6-311++G**) frequencies for the *GAT, ASC* and *GSC* forms of OD-DMG in Ar matrixes

| Approximate description | Conformer | Calculated frequency (cm-1) |  (cm-1) in argon |
| --- | --- | --- | --- |
| CH3as´´(1) | *GSC*  *GAT*  *ASC* | 3061.2  3042.6  3036.9 | 3020.6  3001.2; 2993.0  2993.0 |
| CH3as´´(2) | *GAT*  *ASC*  *GSC* | 3039.8  3034.7  3032.3 | 3001.2; 2993.0  2993.0  2987.5 |
| CH2 as | *ASC*  *GAT*  *GSC* | 3009.9  3007.9  2996.2 | 2981.2  2981.2  2947.3 |
| CH3as´(1) | *GSC*  *GAT*  *ASC* | 3007.2  3003.1  2999.8 | 2981.2  2963.4  2963.4 |
| CH3as´(2) | *ASC*  *GAT*  *GSC* | 3000.4  3000.7  2989.4 | 2963.4  2960.8  2947.3 |
| CH2s | *ASC*  *GAT*  *GSC* | 2970.1  2944.7  2832.8 | 2923.3  2913.3; 2903.9; 2899.0; 2897.2  2781.8; 2777.7 |
| CH3s(1) | *ASC*  *GAT*  *GSC* | 2928.1  2895.0  2851.0 | 2892.7 (?); 2889.8 (?); 2887.1  2869.8; 2846.6  2808.1; 2801.1 |
| CH3s(2) | *ASC*  *GAT* GSC | 2922.0  2890.2  2839.9 | 2884.1 (?); 2882.3 (?)  2844.5; 2836.3  2786.5 |
| O-D | *GSC*  *ASC*  *GAT* | 2677.9  2664.8  2481.3 | 2638.1; 2633.2; 2631.5  2628.5; 2627.1; 2622.9  2389.4; 2381.9 |
|  C=O | *GAT*  *GSC*  *ASC* | 1796.0  1781.2  1769.2 | 1798.8; 1797.0; 1794.1  1785.7; 1784.0  1768.5; 1770.5; 1760.7 |
| CH3as´´(2) | *ASC*  *GAT*  *GSC* | 1497.9  1469.3  1462.9 | 1485.5  1464.4  1460.2 |
| CH3as´´(1) | *ASC*  *GAT*  *GSC* | 1483.9  1481.4  1478.5 | 1477.7  1474.4; 1471.6  1475.7 |
| CH3as´(1) | *GSC*  *GAT*  *ASC* | 1473.3  1467.4  1461.8 | 1468.9  1464.4  1459.1 |
| CH3s(1) | *GAT*  *GSC*  *ASC* | 1451.3  1447.3  1445.6 | 1448.8  1446.7  1434.7 |
| CH3as´(2) | *GAT*  *GSC*  *ASC* | 1454.7  1454.6  1448.8 | 1450.1  1453.8  1440.7 |
| CH2 | *GAT*  *GSC*  *ASC* | 1428.7  1422.7  1411.9 | 1427.5; 1425.2  1417.5  1407.1 |
| CH3s(2) | *GAT*  *GSC*  *ASC* | 1413.9  1410.3  1403.7 | 1413.8  --------  -------- |
| wCH2 | *GSC*  *ASC*  *GAT* | 1382.1  1356.3  1330.4 | 1391.9  1368.2; 1365.5  1337.3; 1333.4; 1331.8 |
| tw CH2 | *ASC*  *GSC*  *GAT* | 1325.3  1286.9  1276.0 | 1326.1; 1322.5  1293.4  1285.9 |
| CH3´(2) | ASC | 1302.7 | 1300.5; 1298.4 |
| CH3´(1) | GSCGAT | 1280.9  1269.6 | ---------  1270.9; 1268.3 |
| C-O (Fermi resonance with N-Cs + inversion) | *GAT* | 1279.8 | 1279.8; 1263.0 |
| C-O | *GSC* ASC | 1200.2  1194.0 | 1220.1; 1216.5  1209.5; 1204.6 |
| 2 x OCO | GAT |  | 1245.4; 1239.1; 1229.3 |
| N-Cas | GATASCGSC | 1166.3  1165.2  1160.8 | 1177.5; 1174.2; 1169.6  1165.5  1156.4; 1154.7 |
| CH3´´(1) | ASC *GSC* GAT | 1151.3  1146.7  1148.0 | ------  1149.3  1153.5; 1152.5 |
| CH3´´(2) | GSCGAT *ASC* | 1093.0  1093.2  1092.8 | 1098.4  1099.2  1098.4 |
| C-N | GSC *ASC*  *GAT* | 1093.0  1069.4  1027.3 | 1067.7; 1065.7; 1064.4  1075.9; 1074.3; 1072.6; 1070.4  1042.5; 1041.1; 1040.3; 1039.1; 1033.6 |
| CH3´(1) | ASC | 1049.6 | 1062.9; 1061.6 |
| CH3´(2) | *GSC* GAT | 1039.4  1035.6 | 1052.7; 1050.7; 1048.3  1046.9; 1045.5; 1044.5 |
| COD | GSCASC GAT | 993.2  984.7  982.6 | 1012.1; 1009.2; 1007.5; 1005.1  1000.4; 996.9; 993.5  987.2; 985.6 |
| CH2 | GSC *GAT*  ASC | 975.3  962.5  960.3 | 979.9  972.6; 971.5  967.1 |
| 2 x CC=O | GAT |  | 963.9; 962.4 |
| C-C | *GAT*  *GSC*  *ASC* | 854.6  812.7  775.5 | 874.6; 873.5; 871.3  798.3  787.7 |
| N-Cs | GSC  *GAT*  ASC | 860.3  846.1  830.8 | 877.8; 876.3  863.9; 862.3; 860.4; 858.1  830.7 |
| OCO | GAT  *GSC*  *ASC* | 612.8  599.9  599.4 | 622.9; 621.8; 619.7; 616.0  608.1; 605.9  602.6; 601.2 |
| C-O | GAT | 595.1 | 590.6; 589.4; 588.0; 587.1; 585.0 |
| C=O | GSC  *ASC*  *GAT* | 582.0  574.2  560.6 | 582.5  576.4  570.3 |
| C-C=O | GAT  GSC | 490.7  473.2 | 500.7(?)  475 |
| inversion | ASC | 464.6 | 475 |

, streching, , bending,  rocking, tw, twisting,  torsion, w, wagging, ?, doubtful assignment. See supplementary material for definition of symmetry coordinates, full set of calculated frequencies and intensities and PED.

Table S3 (Supplementary Material) – Definition of symmetry coordinates

Definition Symmetrya Approximate

description

S1  C1-O2 A´  C=O

S2 C1-O3 A´ C-O

S3 O3-H4 A´ O-H

S4 C1-C14 A´ C-C

S5 (C14-H15)+  (C14-H16) A´ CH2 s

S6 (C14-H15)-  (C14-H16) A´´ CH2 as

S7 C14-N5 A´ C-N

S8 (N5-C6)+ (N5-C10) A´ N-Cs

S9 (N5-C6)- (N5-C10) A´´ N-Cas

S10 (C6-H9)+ (C6-H7)+ (C6-H8)+ (C10-H13)+ (C10-H12)+ (C10-H11) A´ CH3s(1)

S11 (C6-H9)+ (C6-H7)+ (C6-H8)- (C10-H13)-(C10-H12)- (C10-H11) A´´ CH3s(2)

S12 2(C6-H9)- (C6-H7)- (C6-H8)+2(C10-H13)- (C10-H12)- (C10-H11) A´ CH3as´(1)

S13 2(C6-H9)- (C6-H7)- (C6-H8)-2(C10-H13)+ (C10-H12)+ (C10-H11) A´´ CH3as´(2)

S14 (C6-H7)- (C6-H8)+ (C10-H12)- (C10-H11) A´ CH3as´´(1)

S15 (C6-H7)- (C6-H8)- (C10-H12)+ (C10-H11) A´´ CH3as´´(2)

S16 C1-O3-H4 A´ COH

S17 2(O2-C1-O3)- (C14-C1-O2)- (C14-C1-O3) A´ OCO

S18 (C14-C1-O2)- (C14-C1-O3) A´ C-C=O

S19 5(H15-C14-H16) - (H15-C14-C1)- (H16-C14-C1)- (H15-C14-N5)- (H16-C14-N5)-

(N5-C14-C1) A´ CH2

S20 - (H15-C14-C1)- (H16-C14-C1)- (H15-C14-N5)- (H16-C14-N5)+ 4(N5-C14-C1) A´ NCC

S21 (H15-C14-C1)+ (H16-C14-C1)- (H15-C14-N5)- (H16-C14-N5) A´ wCH2

S22 (H15-C14-C1)- (H16-C14-C1)- (H15-C14-N5)+ (H16-C14-N5) A´´ twCH2

S23 (H15-C14-C1)- (H16-C14-C1)+ (H15-C14-N5)- (H16-C14-N5) A´´ CH2

S24 2 (C6-N5-C10)- (C6-N5-C14)- (C10-N5-C14) A´ N(CH3)2

S25 (C6-N5-C14)- (C10-N5-C14) A´´ tw N(CH3)2

S26 (H7C6H9)+ (H9C6H8)+ (H7C6H8)- (H7C6N5)- (H9C6N5)- (H8C6N5)

+ (H12C10H13) +(H13C10H11)+(H12C10H11)- (H12C10N5)- (H13C10N5)- (H11C10N5) A´ CH3s(1)

S27 (H7C6H9)+ (H9C6H8)+ (H7C6H8)- (H7C6N5)- (H9C6N5)- (H8C6N5)

-(H12C10H13) -(H13C10H11)-(H12C10H11)+ (H12C10N5)+ (H13C10N5)+(H11C10N5) A´´ CH3s(2)

S28 -(H7C6H9)- (H9C6H8)+ 2(H7C6H8) - (H12C10H13) -(H13C10H11)+2 (H12C10H11) A´ CH3as´(1)

S29 -(H7C6H9)- (H9C6H8)+ 2(H7C6H8) + (H12C10H13) +(H13C10H11)-2 (H12C10H11) A´´ CH3as´(2)

S30 (H7C6H9)- (H9C6H8)+ (H12C10H13) -(H13C10H11) A´ CH3as´´(1)

S31 (H7C6H9)- (H9C6H8)- (H12C10H13) + (H13C10H11) A´´ CH3as´´(2)

S32 -(H7C6N5)- (H9C6N5)+2 (H8C6N5)- (H12C10N5)- (H13C10N5)+2 (H11C10N5) A´ CH3´(1)

S33 -(H7C6N5)- (H9C6N5)+2 (H8C6N5) + (H12C10N5)+ (H13C10N5)-2 (H11C10N5) A´´ CH3´(2)

S34 (H7C6N5)- (H9C6N5)+ (H12C10N5)+ (H13C10N5) A´ CH3´´(1)

S35 (H7C6N5)- (H9C6N5)- (H12C10N5)+ (H13C10N5) A´´ CH3´´(2)

S36 O2=C1-O3-H4  A´´ C-O

S37 N5-C14-C1=O2 A´´ C-C

S38 (C1-C14-N5-C6)+ (C1-C14-N5-C10) A´´ C-N

S39 (H9-C6-N5-C14)+ (H13-C10-N5-C14) A´´ CH3s

S40 (H9-C6-N5-C14)- (H13-C10-N5-C14) A´ CH3as

S41 O2 out of plane C14-C1-O3 A´´ C=O

S42 inversion A´ inversion

a Symmetry applies strictly only to *ASC* conformer (Cs symmetry)

, bond streching, , bending,  rocking, tw, twisting, w, wagging,  torsion.

Table S4 – DFT(B3LYP)/6-311++G** calculated frequencies and intensities, and normal coordinate analysis for dimethylglycine (*GAT* conformer)a

Approximate Calculated frequency Intensity PEDb

Description Scaled (0.978) non-scaled

OH 3409.9 3486.6 308.2 S3(99.4)

CH3as´´(1) 3042.6 3111.0 31.5 S14(96.1)

CH3as´´(2) 3039.8 3108.2 10.6 S15(95.3)

CH2 as 3007.9 3075.6 8.5 S6(78.3) + S5(18.4)

CH3as´(1) 3003.1 3070.7 24.4 S12(49.4) + S10(34.2)

CH3as´(2) 3000.6 3068.1 17.4 S13(51.9) + S11(32.7)

CH2 s 2944.7 3010.9 30.4 S5(81.0) + S6(18.4)

CH3s(1) 2895.0 2960.1 105.5 S10(56.5) + S12(39.1)

CH3s(2) 2890.2 2955.2 41.9 S11(58.9) + S13(37.0)

 C=O 1803.6 1844.2 417.4 S1(84.6)

CH3as´´(1) 1481.4 1514.7 10.8 S30(103.0) + S32(10.8)

CH3as´(1) 1469.8 1502.9 25.5 S28(45.0) + S31(42.0)

CH3as´´(2) 1467.6 1500.6 20.1 S31(58.8) + S28(44.1)

CH3as´(2) 1454.8 1487.5 5.9 S29(92.8)

CH3s(1) 1452.2 1484.9 7.6 S26(49.1) + S19(25.9) + S28(10.4)+

+ S29(12.7)

CH2 1429.1 1461.2 1.6 S19(58.1) + S26(34.0)

CH3s(2) 1403.9 1445.7 0.4 S27(99.9)

COH 1370.8 1401.6 341.3 S16(69.5)

wCH2 1328.7 1358.6 17.6 S21(70.2)

twCH2 1274.0 1302.7 14.6 S22(49.5) + S21(14.8) + S9(14.4)

CH3´(1) 1269.2 1297.8 14.1 S32(39.6) + S7(16.9) + S8(10.0) +

+ S24(12.0) + S30(13.4)

C-O 1184.3 1210.9 12.3 S2(32.7) + S4(12.8) + S16(11.1)+

+ S34(18.8)

N-Cas 1164.2 1190.4 19.5 S9(23.1) + S22(20.9) + S33(12.4) +

+ S34(13.7)

CH3´´(1) 1137.4 1163.0 28.9 S34(32.1) + S22(18.0) + S2(13.1)

CH3´´(2) 1093.1 1117.7 6.0 S35(70.6) + S33(18.8)

CH3´(2) 1035.1 1058.4 17.7 S33(49.3) + S9(30.7)

C-N 1027.3 1050.4 30.9 S7(40.1) + S8(17.3) + S32(19.7)

CH2 966.1 987.8 14.6 S23(60.7) + S41(18.4) +S9(11.5)

C-C 856.2 875.5 11.9 S4(34.9) S2(20.8) + S8(25.0)

N-Cs 846.7 865.7 29.8 S8(32.4) + S2(13.4) + S4(10.0) +

+ S7(11.8) + S20(15.3)

C-O 819.5 837.9 72.6 S36(99.1)

OCO 632.0 646.2 1.1 S17(53.9) + S20(13.2)

C=O 563.3 576.0 6.9 S41(51.8) + S23(12.8) + S17(11.2)

C-C=O 491.4 502.5 4.3 S18(26.5) + S24(22.8)

inversion 391.5 400.3 11.6 S42(46.1) + S25(26.2)

tw N(CH3)2  387.3 396.0 12.1 S25(36.3) + S18(25.3)

N(CH3)2 356.7 364.7 0.6 S24(39.8) + S42(18.1) + S4(11.7)

CH3as 250.9 256.5 1.3 S40(74.2) + S24(13.1)

CH3s 237.3 242.6 0.2 S39(96.6)

NCC 186.4 190.6 4.2 S20(42.4) + S42(16.1) + S40(14.6)+

+ S18(12.2)

C-C 106.8 109.2 0.6 S37(62.1) + S38(29.4)

C-N 73.6 75.3 6.7 S38(67.1) + S37(29.8)

a Frequencies in cm-1, intensities in km mol-1. , bond streching, , bending,  rocking, tw, twisting, w, wagging,  torsion. See Table S3 for definition of symmetry coordinate.

b Only PED values greater than 10 % are given.

Table S5 – DFT(B3LYP)/6-311++G** calculated frequencies and intensities, and normal coordinate analysis for deuterated dimethylglycine (*GAT* conformer)a

Approximate Calculated frequency Intensity PEDb

Description Scaled (0.978) non-scaled

CH3as´´(1) 3042.6 3111.0 32.4 S14(96.1)

CH3as´´(2) 3039.8 3108.2 10.6 S15(95.3)

CH2 as 3007.9 3075.6 8.5 S6(78.3) + S5(18.4)

CH3as´(1) 3003.1 3070.7 24.2 S12(49.4) + S10(34.2)

CH3as´(2) 3000.7 3068.2 17.2 S13(51.9) + S11(32.7)

CH2 s 2944.8 3011.0 31.8 S5(80.9) + S6(18.4)

CH3s(1) 2895.3 2960.4 98.7 S10(56.6) + S12(39.3)

CH3s(2) 2890.2 2955.2 41.0 S11(59.1) + S13(37.1)

OD 2481.3 2537.1 167.9 S3(99.3)

 C=O 1796.0 1836.4 419.4 S1(87.6)

CH3as´´(1) 1481.4 1514.7 10.7 S30(103.0) + S32(10.8)

CH3as´´(2) 1469.3 1502.4 15.2 S31(56.1) + S28(32.4)

CH3as´(1) 1467.4 1500.4 16.9 S28(59.5) + S31(44.5)

CH3as´(2) 1454.7 1487.4 5.3 S29(97.4)

CH3s(1) 1451.3 1483.9 2.2 S26(51.7) + S19(29.2)

CH2 1428.7 1460.8 4.3 S19(56.4) + S26(37.7)

CH3s(2) 1413.9 1445.7 0.3 S27(100.0)

wCH2 1330.4 1360.3 10.3 S21(68.1)

twCH2 1276.0 1304.7 46.8 S22(45.3) + S21(16.7) + S9(12.1)

CH3´(1) 1269.6 1298.2 18.8 S32(37.2) + S7(15.2) + S24(11.8) +

+ S30(12.7)

C-O 1247.5 1275.6 216.8 S2(38.9)+ S4(16.3) + S16(12.2) +

+ S17(10.0)

N-Cas 1166.3 1192.5 21.1 S9(16.8) + S34(32.1) + S22(12.6)

CH3´´(1) 1148.0 1173.8 17.8 S34(30.9) + S22(26.3)

CH3´´(2) 1093.2 1117.8 4.6 S35(71.4) + S33(18.3)

CH3´(2) 1035.6 1058.9 14.8 S33(49.0) + S9(29.5)

C-N 1027.3 1050.4 28.3 S7(38.9) + S32(19.1) + S8(16.9)

COD 982.6 1004.7 40.7 S16(58.3) + S23(11.4)

CH2 962.5 984.2 8.6 S23(49.2) + S41(17.6) + S16(12.0)

C-C 854.6 873.8 9.9 S4(35.0) + S8(27.8) + S2(17.8)

N-Cs 846.1 865.1 34.5 S8(30.3) + S20(15.4) + S7(11.2) +

+ S4(12.0) +S2(15.1)

OCO 612.8 626.6 4.8 S17(44.9) + S20(13.4)

C-O 595.1 608.5 27.1 S36(85.2) + S41(20.6)

C=O 560.6 573.2 10.5 S41(36.3) + S23(10.5) + S17(15.5)

C-C=O 490.7 501.7 4.2 S18(25.3) + S24(23.5)

inversion 391.0 399.8 6.6 S42(36.7) + S25(39.4)

tw N(CH3)2 379.7 388.2 16.7 S25(22.8) + S18(27.0) + S42(18.8)

N(CH3)2 356.2 364.2 0.6 S24(40.0) + S42(17.6) + S4(11.7)

CH3as249.7 255.3 1.3 S40(76.6) + S24(12.6)

CH3s 237.3 242.6 0.2 S39(96.8)

NCC 182.8 186.9 4.3 S20(42.8) + S42(15.7) + S18(13.5)+

+ S40(12.6)

C-C 106.1 108.5 0.6 S37(61.9) + S38(30.5)

C-N 73.4 75.1 6.7 S38(65.6) + S37(31.3)

a Frequencies in cm-1, intensities in km mol-1, , bond stretching, , bending,  rocking, tw, twisting, w, wagging,  torsion. See Table S3 for definition of symmetry coordinate.

b Only PED values greater than 10 % are given.

Table S6 – DFT(B3LYP)/6-311++G** calculated frequencies and intensities, and normal coordinate analysis for dimethylglycine (*ASC* conformer)a

Approximate Calculated frequency Intensity PEDb

Description Scaled (0.978) non-scaled

O-H 3663.0 3745.4 49.1 S3(100.1)

CH3as´´(2) 3036.9 3105.2 52.8 S15(100.1)

CH3as´´(1) 3034.7 3103.0 14.9 S14(99.7)

CH2 as 3009.9 3077.6 7.9 S6(99.8)

CH3as´(2) 3000.4 3067.9 19.7 S13(76.9) + S11(23.1)

CH3as´(1) 2999.8 3067.3 54.4 S12(72.4) + S10(27.6)

CH2 s 2970.1 3036.9 18.6 S5(98.9)

CH3s(1) 2928.1 2994.0 70.3 S10(71.8) + S12(27.2)

CH3s(2) 2922.0 2987.7 71.6 S11(77.1) + S13(23.1)

C=O 1776.0 1815.9 256.7 S1(86.0)

CH3as´´(2) 1497.9 1531.6 17.1 S31(91.9)

CH3as´´(1) 1483.9 1517.3 4.6 S30(95.1) + S29(11.5)

CH3as´(1) 1461.9 1494.8 14.8 S28(66.8) + S26(16.8)

CH3as´(2) 1448.8 1481.4 6.8 S29(82.5)

CH3s(1) 1445.6 1478.1 5.7 S26(69.3) + S28(17.9)

CH3s(2) 1413.7 1445.5 0.1 S27(101.1)

CH2 1411.9 1443.7 17.3 S19(84.4) + S26(11.8)

wCH2  1362.4 1393.0 6.7 S21(62.9)

twCH2 1325.3 1355.1 9.7 S22(55.9) + S9(21.8)

CH3´(2) 1303.8 1333.1 31.3 S33(27.3) + S7(25.8) + S8(12.1) +

+ S24(10.5) + S31(11.5)

COH 1266.6 1295.1 20.7 S16(45.1) + S21(23.3) + S17(12.1) + S2(10.0)

N-Cas1165.2 1191.4 7.4 S9(27.6) + S22(39.1) + S32(12.9)

CH3´´(1) 1156.4 1182.4 25.2 S34(59.6) + S32(19.9)

C-O 1114.1 1139.2 192.2 S2(40.1) + S16(25.3)

CH3´´(2) 1092.8 1117.4 7.6 S35(67.3) + S33(22.4)

C-N 1063.9 1087.8 163.8 S7(35.5) + S33(27.0) + S8(11.4) + S2(11.6)

CH3´(1) 1049.6 1073.2 12.4 S32(47.1) + S9(32.4) + S34(15.3)

CH2  960.3 981.9 14.7 S23(58.0) + S41(20.6) + S9(13.1)

N-Cs 832.9 851.6 7.8 S8(63.0) + S7(15.7) + S4(12.0)

C-C 815.1 833.4 6.7 S4(45.9) + S20(17.4)

C-O 640.3 654.7 99.1 S36(60.1) + S41(30.5)

OCO 636.5 650.8 41.8 S17(37.9) + S2(16.2) + S20(15.5)

C=O 490.3 501.3 25.0 S41(44.7) + S36(40.2) + S23(14.9)

CC=O 477.8 488.5 18.0 S17(33.6) + S24(19.8) + S4(17.3)

tw N(CH3)2 405.3 414.4 0.3 S25(75.4) + S23(11.0)

N(CH3)2 367.6 375.9 5.0 S24(52.2) + S40(11.9) + S42(11.2)

inversion 303.5 320.6 3.4 S18(46.7) + S42(47.0)

CH3s 233.0 238.2 0.3 S39(93.6)

CH3as224.5 229.5 1.4 S40(82.9) + S24(10.1)

NCC 174.6 178.5 6.0 S20(45.7) + S42(28.4) + S18(16.0)

C-N 103.1 115.6 1.2 S38(96.3)

C-C 44.4 45.4 0.4 S37(106.0)

a Frequencies in cm-1, intensities in km mol-1, , bond stretching, , bending,  rocking, tw, twisting, w, wagging,  torsion. See Table S3 for definition of symmetry coordinate.

b Only PED values greater than 10 % are given.

Table S7 – DFT(B3LYP)/6-311++G** calculated frequencies and intensities, and normal coordinate analysis for deuterated dimethylglycine (*ASC* conformer)a

Approximate Calculated frequency Intensity PEDb

Description Scaled (0.978) non-scaled

CH3as´´(2) 3036.9 3105.2 52.7 S15(100.1)

CH3as´´(1) 3034.7 3103.0 14.9 S14(99.7)

CH2 as 3009.9 3077.6 8.0 S6(99.8)

CH3as´(2) 3000.4 3067.9 19.7 S13(76.9) + S11(23.1)

CH3as´(1) 2999.8 3067.3 54.4 S12(72.4) + S10(27.6)

CH2 s 2970.2 3037.0 18.4 S5(98.9)

CH3s(1) 2928.1 2994.0 70.3 S10(71.8) + S12(27.2)

CH3s(2) 2922.0 2987.7 71.6 S11(77.1) + S13(23.1)

O-D 2664.8 2724.7 33.2 S3(100.0)

C=O 1769.2 1809.0 243.6 S1(88.4)

CH3as´´(2) 1497.9 1531.6 17.1 S31(91.9)

CH3as´´(1) 1483.9 1517.3 4.6 S30(95.1) + S29(11.5)

CH3as´(1) 1461.8 1494.7 14.9 S28(66.9) + S26(16.8)

CH3as´(2) 1448.8 1481.4 6.9 S29(82.5)

CH3s(1) 1445.6 1478.1 5.7 S26(69.4) + S28(17.8) + S19(9.6)

CH3s(2) 1403.7 1445.5 0.1 S27(101.1)

CH2 1411.9 1443.7 17.3 S19(84.3) + S26(11.9)

wCH2  1356.3 1386.8 5.9 S21(71.6)

twCH2 1325.3 1355.1 9.7 S22(55.9) + S9(21.8)

CH3´(2) 1302.7 1332.0 28.9 S33(27.7) + S7(24.8) + S8(12.3) +

+ S24(10.5) + S31(11.6)

C-O 1194.0 1220.9 204.7 S2(39.9) + S4(10.1) + S17(17.0) +

+ S21(16.7)

N-Cas1165.2 1191.4 7.4 S9(27.6) + S22(39.1) +S32(12.9)

CH3´´(1) 1151.3 1177.2 9.2 S34(60.7) + S32(20.2)

CH3´´(2) 1092.8 1117.4 7.6 S35(67.3) + S33(22.4)

C-N 1069.4 1093.5 57.3 S7(39.2) + S8(11.8) + S33(29.9) +

+ S35(10.0)

CH3´(1) 1049.6 1073.2 12.4 S32(47.1) + S9(32.4) + S34(15.3)

COD 984.7 1006.9 96.4 S16(47.8) + S2(29.1)

CH2 960.3 981.9 14.7 S23(58.0) + S41(20.6) + S9(13.1)

N-Cs 830.8 849.5 8.1 S8(70.4) + S7(18.3)

C-C 775.5 792.9 14.8 S4(49.9) + S16(19.1) + S20(18.9)

OCO 599.4 612.9 35.7 S2 (15.7) + S16(15.5) + S17(23.7) +

+ S18(10.9) + S20(11.7)

C=O 574.2 587.1 26.2 S41(66.2) + S23(16.4) + S36(12.7)

OCO 464.6 475.1 22.8 S17(39.2) + S24(20.3) + S4(13.4)

tw N(CH3)2  407.4 416.6 15.2 S25(48.2) + S36(23.5) + S23(16.4)

C-O 399.1 408.1 28.4 S36(64.1) + S25(27.7)

N(CH3)2 366.8 375.0 5.1 S24(49.8) + S42(12.6) + S40(11.5)

CC=O 310.7 317.7 4.0 S18(46.7) + S42(45.9)

CH3s 233.0 238.2 0.3 S39(93.7)

CH3as224.4 229.4 1.4 S40(83.2) + S24(10.2)

NCC 173.3 177.2 5.6 S20(45.7) + S42(28.0) + S18(16.6)

C-N 112.4 114.9 1.1 S38(95.8)

C-C 43.9 44.9 0.4 S37(106.2)

a Frequencies in cm-1, intensities in km mol-1, , bond streching, , bending,  rocking, tw, twisting, w, wagging,  torsion. See Table S3 for definition of symmetry coordinate.

b Only PED values greater than 10 % are given.

Table S8 – DFT(B3LYP)/6-311++G** calculated frequencies and intensities, and normal coordinate analysis for dimethylglycine (*GSC* conformer)a

Approximate Calculated frequency Intensity PEDb

Description Scaled (0.978) non-scaled

O-H 3680.9 3763.7 73.2 S3(100.1)

CH3as´´(1) 3061.2 3130.1 10.0 S15(41.9) + S14(48.6)

CH3as´´(2) 3032.3 3100.5 29.5 S15(50.1) + S14(48.6)

CH3as´(1) 3007.2 3074.8 26.2 S10(25.3) + S11(18.9) + S12(23.4) +

+ S13(19.7)

CH2 as 2996.2 3063.6 12.2 S5(40.7) + S6(55.0)

CH3as´(2) 2989.4 3056.6 29.2 S10(22.5) + S11(25.0)+ S12(21.8) + S13(26.5)

CH3s(1) 2851.0 2915.1 184.5 S10(43.8) + S12(47.5)

CH3s(2) 2839.9 2903.8 46.7 S11(50.3) + S13(48.5)

CH2 s 2832.8 2896.5 45.9 S5(53.1) + S6(38.3)

C=O 1788.3 1828.5 297.0 S1(85.8)

CH3as´´(1) 1478.5 1511.8 11.8 S28(20.3) + S30(85.5)

CH3as´(1) 1473.3 1506.4 13.6 S28(37.0) + S29(21.7) + S30(11.4) +

+ S31(21.9)

CH3as´´(2) 1462.9 1495.8 14.4 S28(12.4) + S31(72.3)

CH3as´(2) 1454.6 1487.3 12.7 S28(11.3) + S29(77.7)

CH3s(1) 1447.4 1480.0 1.7 S19(14.3) + S26(49.6) + S28(11.5) +

+ S29(13.0)

CH2 1422.8 1454.8 11.3 S19(71.2) + S26(25.4)

CH3s(2) 1410.3 1442.0 0.4 S27(101.0)

wCH2 1386.4 1417.6 12.5 S21(58.9)

twCH2 1293.7 1322.8 22.3 S16(16.2) + S22(27.5)

CH3´(1) 1281.0 1309.8 12.6 S7(19.6) + S22(12.9) + S30(10.3) + S32(25.7)

COH 1268.3 1296.8 10.1 S16(37.7) + S21(14.8) + S22(21.6)

N-Cas1184.6 1211.2 33.9 S9(27.0) + S22(23.9) + S33(12.2)

CH3´´(1) 1147.1 1172.9 9.0 S32(17.8) + S34(54.6)

C-O 1104.8 1129.7 272.5 S2(43.9) + S16(20.8) + S21(10.2)

CH3´´(2) 1093.0 1117.6 5.4 S33(15.6) + S35(74.7)

C-N 1051.6 1075.3 120.9 S7(37.9) + S8(12.4) + S32(22.0) + S34(10.5)

CH3´(2) 1039.4 1062.8 18.7 S9(35.0) + S33(53.1)

CH2  975.4 997.3 6.5 S23(64.8) + S41(21.3)

C-C 872.4 892.0 15.1 S2(10.9) + S4(33.2) + S8(37.5)

N-Cs 840.9 859.8 21.0 S4(19.2) + S7(11.2) +S8(30.5) + S20(16.7)

C=O 640.9 655.3 55.1 S17(22.9) + S36(20.5) + S41(24.6)

OCO 628.6 642.7 65.2 S17(27.0) + S36(25.7) + S41(16.7)

C-O 506.2 517.6 33.5 S36(53.4) + S41(35.0)

C-C=O 482.0 492.8 9.0 S17(15.5) + S18(17.6) + S24(36.2)

N(CH3)2 366.4 374.6 6.5 S18(14.6) + S24(30.2) + S40(10.9) +

+ S42(20.3)

tw N(CH3)2 361.7 369.8 0.7 S18(19.7) + S25(57.0)

inversion 341.0 348.7 6.4 S42(58.6)

CH3as 255.0 260.7 0.5 S24(10.3) + S39(24.2) + S40(57.1)

CH3s 238.6 244.0 0.3 S39(72.8) + S40(22.7)

NCC 182.9 187.0 2.9 S18(21.0) + S20(47.7) + S25(10.6)

C-N 104.1 106.4 0.3 S38(92.1)

C-C 50.1 51.2 0.2 S37(103.4)

a Frequencies in cm-1, intensities in km mol-1, , bond streching, , bending,  rocking, tw, twisting, w, wagging,  torsion. See Table S3 for definition of symmetry coordinate.

b Only PED values greater than 10 % are given.

Table S9 – DFT(B3LYP)/6-311++G** calculated frequencies and intensities, and normal coordinate analysis for deuterated dimethylglycine (*GSC* conformer)a

Approximate Calculated frequency Intensity PEDb

Description Scaled (0.978) non-scaled

CH3as´´(1) 3061.2 3130.1 10.0 S14(46.5) + S15(41.9)

CH3as´´(2) 3032.3 3100.5 29.4 S14(48.6) + S15(50.1)

CH3as´(1) 3007.2 3074.8 26.2 S10(25.3) + S11(18.9) + S12(23.4)+

+ S13(19.7)

CH2 as 2996.2 3063.6 12.2 S5(40.7) + S6(55.0)

CH3as´(2) 2989.4 3056.6 29.1 S10(22.5) + S11(25.0) + S12(21.8)+

+ S13(26.5)

CH3s(1) 2851.0 2915.1 184.5 S10(43.8) + S12(47.5)

CH3s(2) 2839.9 2903.8 46.7 S11(50.3) + S13(48.5)

CH2 s 2832.9 2896.6 45.1 S5(53.0) + S6(38.3)

OD 2677.9 2738.1 48.2 S3(100.0)

C=O 1781.2 1821.3 283.5 S1(88.4)

CH3as´´(1) 1478.5 1511.8 11.8 S28(20.3) + S30(85.5)

CH3as´(1) 1473.3 1506.4 13.6 S28(36.9) + S29(21.7) + S30(11.4)+

+ S31(22.0)

CH3as´´(2) 1462.9 1495.8 14.4 S28(12.4) + S31(72.3)

CH3as´(2) 1454.6 1487.3 12.7 S28(11.4) + S29(78.1)

CH3s(1) 1447.3 1479.9 3.6 S19(14.6) + S26(49.8) + S28(11.4)+

+ S29(12.7)

CH2 1422.7 1454.7 11.3 S19(70.6) + S26(26.0)

CH3s(2) 1410.3 1442.0 0.4 S27(101.0)

wCH2 1382.1 1413.2 13.5 S21(64.5)

twCH2 1286.9 1315.8 20.8 S22(40.5)

CH3´(1) 1280.9 1309.7 12.9 S7(18.3) + S22(17.6) + S32(23.5)

C-O 1200.2 1227.2 130.0 S2(19.9) + S9(12.6) + S22(20.7)

N-Cas1160.8 1186.9 94.6 S2(17.8) + S9(17.3) + S17(10.0) +

+ S21(14.9)

CH3´´(1) 1146.7 1172.5 21.3 S32(18.4) + S34(57.1)

CH3´´(2) 1093.0 1117.6 5.6 S33(15.7) + S35(74.5)

C-N 1054.2 1077.9 50.6 S7(40.2) + S8(12.7) + S32(22.9) +

+ S34(12.4)

CH3´(2) 1039.4 1062.8 17.5 S9(35.2) + S33(53.2)

COD 993.2 1015.5 109.3 S2(33.4) + S16(44.7)

CH2 975.3 997.2 7.0 S23(64.5) + S41(21.2)

N-Cs 860.3 879.7 23.5 S7(13.9) + S8(65.0)

C-C 812.7 831.0 15.4 S4(38.2) + S16(18.3) + S20(16.7)

OCO 599.9 613.4 26.2 S17(15.5) + S41(36.9)

C=O 582.0 595.1 29.0 S17(19.6) + S23(10.3) + S41(34.2)

CC=O 473.2 483.8 12.8 S17(21.1) + S18(12.8) + S24(37.7)

C-O 399.8 408.8 41.2 S36(89.5)

 N(CH3)2 363.4 371.6 11.3 S18(11.6) + S24(23.9) + S40(10.1)+

+ S42(24.6)

tw N(CH3)2 361.1 369.2 1.2 S18(22.2) + S25(52.8)

inversion 339.6 347.2 6.1 S24(10.7) + S42(52.1)

CH3as254.8 260.5 0.5 S24(10.3) + S39(24.3) + S40(57.3)

CH3s 238.6 244.0 0.3 S39(72.8) + S40(22.7)

NCC 181.0 185.1 2.7 S18(21.7) + S20(47.4) + S25(10.4)

C-N 103.2 105.5 0.3 S38(92.0)

C-C 49.7 50.8 0.2 S37(103.9)

a Frequencies in cm-1, intensities in km mol-1, , bond streching, , bending,  rocking, tw, twisting, w, wagging,  torsion. See Table S3 for definition of symmetry coordinate.

b Only PED values greater than 10 % are given.

TABLE S10 (supplementary material) - Total Mülliken atomic charges in the most stable conformers in DMG.a

|  | Conformer | | | | | |
| --- | --- | --- | --- | --- | --- | --- |
|  | GAT |  | ASC |  | GSC |  |
| Atom | DFT/B3LYP | MP2 | DFT/B3LYP | MP2 | DFT/B3LYP | MP2 |
| C1 | 0.055 | 0.474 | 0.078 | 0.479 | 0.197 | 0.649 |
| O2 | -0.269 | -0.541 | -0.293 | -0.557 | -0.301 | -0.558 |
| O3 | -0.170 | -0.546 | -0.157 | -0.527 | -0.166 | -0.534 |
| H4 | 0.287 | 0.424 | 0.277 | 0.403 | 0.283 | 0.408 |
| N5 | -0.185 | -0.411 | 0.033 | -0.237 | 0.061 | -0.198 |
| C6 | -0.339 | -0.178 | -0.365 | -0.227 | -0.314 | -0.174 |
| H7 | 0.148 | 0.113 | 0.135 | 0.113 | 0.127 | 0.104 |
| H8 | 0.145 | 0.116 | 0.126 | 0.093 | 0.130 | 0.094 |
| H9 | 0.141 | 0.119 | 0.149 | 0.131 | 0.127 | 0.115 |
| C10 | -0.353 | -0.210 | -0.365 | -0.227 | -0.408 | -0.268 |
| H11 | 0.144 | 0.108 | 0.126 | 0.093 | 0.123 | 0.082 |
| H12 | 0.162 | 0.122 | 0.135 | 0.113 | 0.155 | 0.143 |
| H13 | 0.144 | 0.125 | 0.149 | 0.131 | 0.133 | 0.115 |
| C14 | -0.287 | -0.034 | -0.439 | -0.125 | -0.513 | -0.290 |
| H15 | 0.191 | 0.154 | 0.206 | 0.171 | 0.185 | 0.150 |
| H16 | 0.187 | 0.165 | 0.206 | 0.171 | 0.182 | 0.163 |

a Charges in units of electron. 1*e*= 1.6 x 10-19 Coulombs. See Figure 1 for atom numbering.
