# Supplementary figures and images for: Matrix-isolation FT-IR spectra and molecular orbital calculations on neutral N,N-dimethylglycine
Source: Royal Society of Chemistry journal article supplement (doi:10.1039/b207320j), 2002-12-13

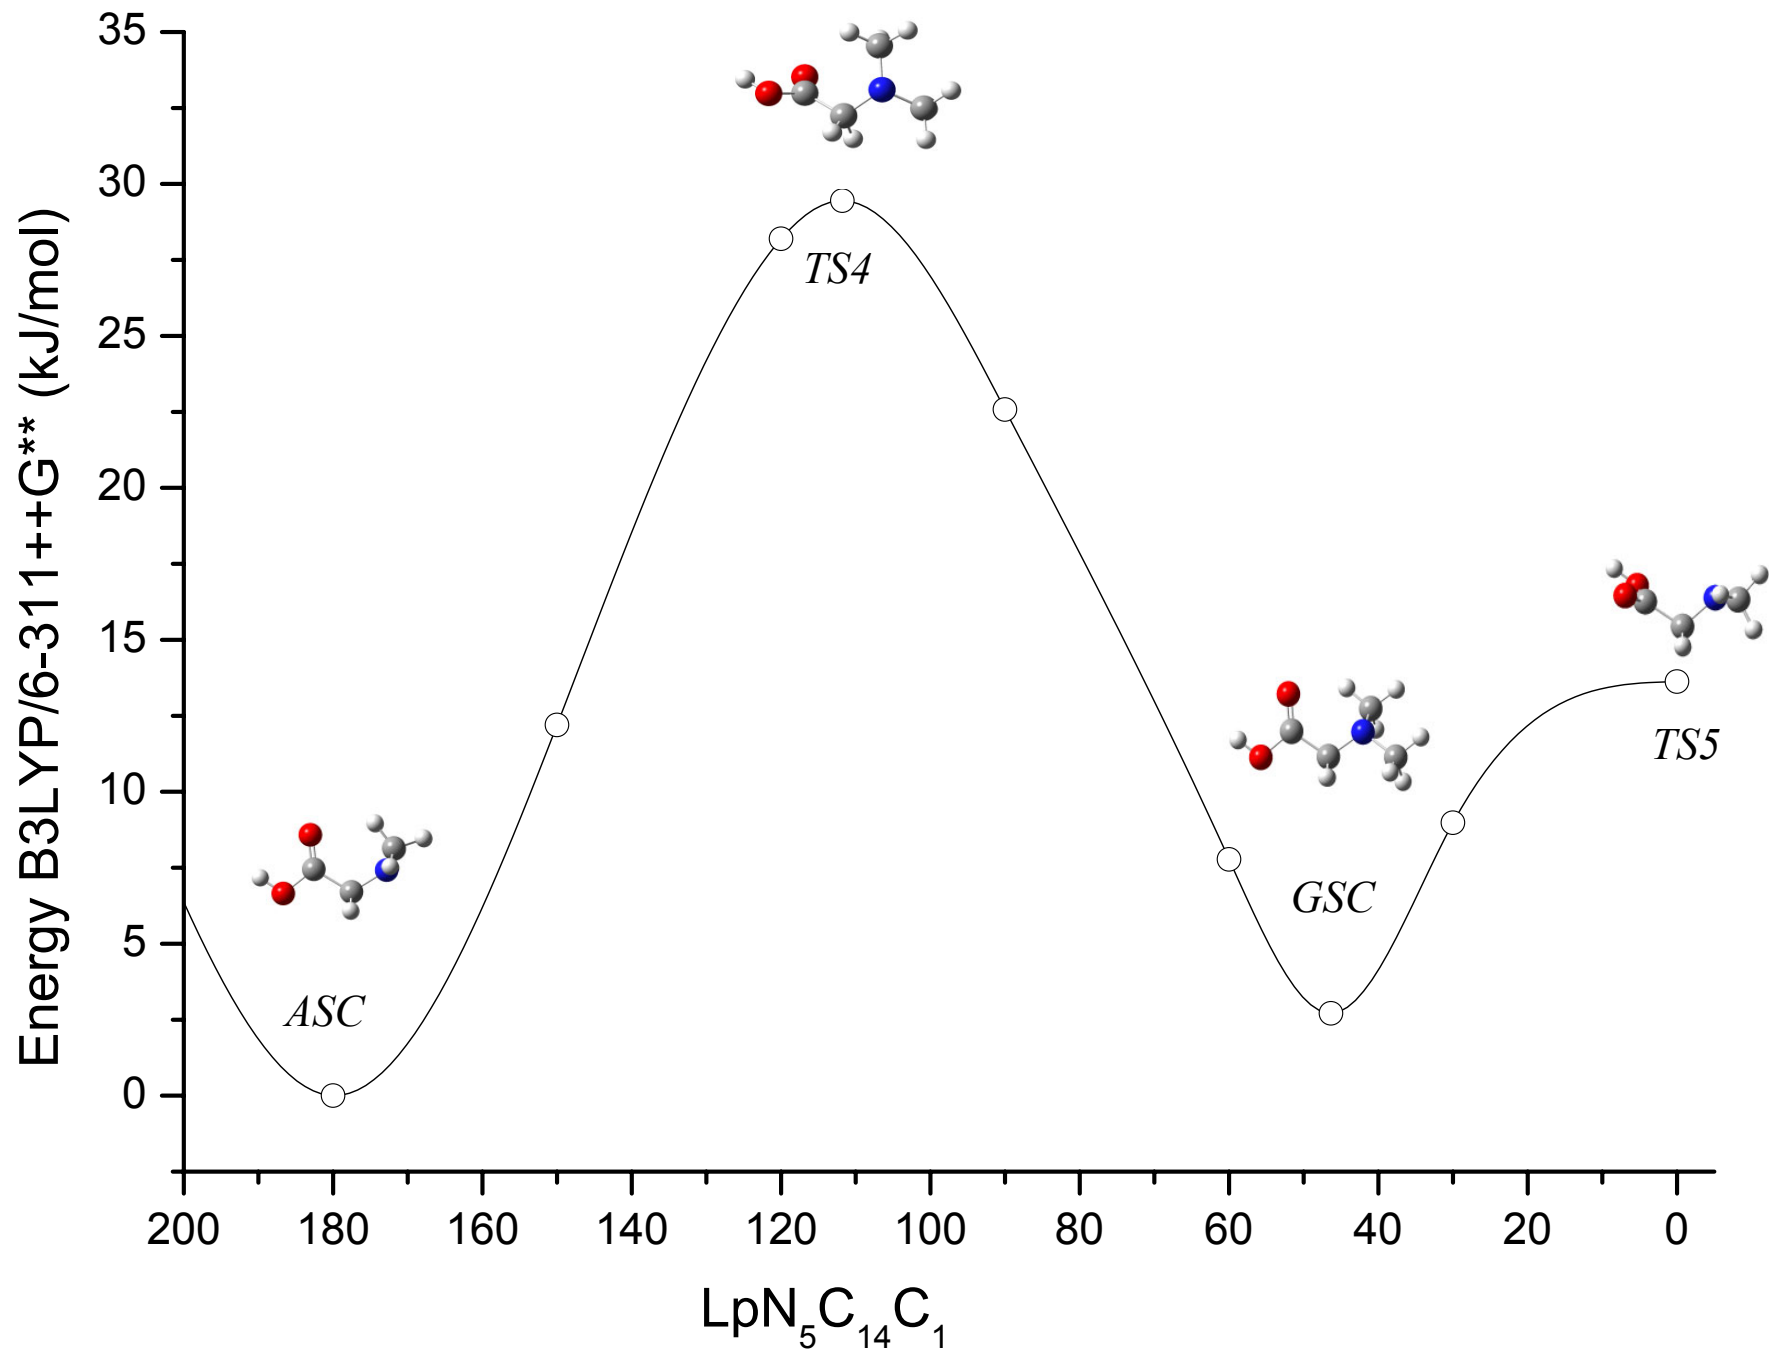

Supplement: figure.pdf [file figure.pdf]
